# Supplementary material for: Inferring Carbon Emissions from Human Mobility Data
Source: Research Square preprint supplement (doi:10.21203/rs.3.rs-3657266/v1), 2024-01-05
Supplement: Supplementary file 2 [file 896886bf1021036b0491c8cb.docx]

Supplementary Information

**Inferring Carbon Emissions from Human Mobility Data**

Mengning Wang1,*, Xiaoling Zhang2,3,*, Suoyi Tan1,*, Qing Zhang1,*, Bin Sai1, Mengsi Cai1, Shuhui Guo1, David Wrathall4, Michael Obersteiner5,†, Mengjun Li1, Zhu Liu6,†, Xiaohong Chen7,8,9,†, Xin Lu1,†,#

1. College of Systems Engineering, National University of Defense Technology, Changsha, China
2. Institute for Climate and Carbon Neutrality, University of Hong Kong, Hong Kong, China
3. Department of Real Estate and Construction, Faculty of Architecture, University of Hong Kong, Hong Kong, China
4. College of Earth, Ocean, and Atmospheric Sciences, Oregon State University, Corvallis, OR, USA
5. Environmental Change Institute, University of Oxford, Oxford, United Kingdom
6. Department of Earth System Science, Tsinghua University, Beijing, China
7. Xiangjiang Laboratory, Changsha, China
8. Institute of Big Data Internet Innovations, Hunan University of Technology and Business, Changsha, China
9. School of Business, Central South University, Changsha, China

*These authors contributed equally to this work.

†These authors are joint senior authors contributed equally to this work.

#Corresponding author: Xin Lu, email: [xin.lu.lab@outlook.com](mailto:xin.lu.lab@outlook.com)

**Contents**

[1. Mobility data description 3](#_Toc153736775)

[1.1 Mobility data of China 3](#_Toc153736776)

[1.2 Mobility data of Italy 3](#_Toc153736777)

[1.3 Mobility data of the U.S. 4](#_Toc153736778)

[1.4 Mobility data of Mexico 4](#_Toc153736779)

[2. Network feature extraction 5](#_Toc153736780)

[2.1 Unweighted node features 5](#_Toc153736781)

[2.2 Weighted node features 5](#_Toc153736782)

[2.3 Unweighted global features 6](#_Toc153736783)

[2.4 Weighted global features 6](#_Toc153736784)

[3. Additional results of correlation between CO2 emissions and human mobility 14](#_Toc153736785)

[4. Additional results of model evaluation 16](#_Toc153736786)

[5. Additional results of model generalization and extrapolation 19](#_Toc153736787)

[6. Division of city cluster in normal times 20](#_Toc153736788)

[7. Data extrapolation and validation 23](#_Toc153736789)

[8. Data representativeness 26](#_Toc153736790)

[8.1 Comparison of mobile phone estimates with population statistics 26](#_Toc153736791)

[8.2 Comparison of mobile phone estimates with Baidu LBS data 27](#_Toc153736792)

[References 29](#_Toc153736793)

1. Mobility data description

## Mobility data of China

The dataset was provided by one of China’s largest national mobile operators, China Unicom, which had 318 million active users as of 2019 1. Cellular Signaling Data (CSD) is generated when users actively initiate a positioning event, such as making phone calls, sending messages, or switching cell towers. If a mobile phone remains inactive for more than 30 minutes, the passive positioning data is automatically recorded as long as the phone is on. The mobility data used in this study derived from CSD, were anonymized and extrapolated to the entire network, and then aggregated into city-level mobility matrices on a daily basis. To exclude population flow resulting from brief stays in a city, users who spent less than 30 minutes in a city were filtered out. The dataset encompasses the period from January 1, 2020, to February 29, 2020, a critical period during the COVID-19 pandemic outbreak.

## Mobility data of Italy

The dataset spans from January 18, 2020, to June 26, 2020 2. It captures aggregated origin-destination movements between different Italian provinces, utilizing location data provided by Cuebiq Inc., a platform specializing in location intelligence and measurement. The dataset was derived from a large-scale dataset of anonymously shared positions of about 170,000 de-identified smartphone users and a total of about 200 million data points at the sub-national scale. These movements were analyzed based on individual user trajectories, identifying stops by assigning time-ordered locations to specific provinces where users spent over 1 hour. Additionally, the mobility data is recorded in the form of OD (origin-destination) matrix, which was normalized by row, each entry (*i*, *j*) in the matrix represents the proportion of user movements from province *i* to province *j*.

## Mobility data of the U.S.

The dataset was sourced from anonymous mobile phone user visits to various locations provided by SafeGraph 3. It covered the period from January 1, 2020, to February 29, 2020, and offers valuable insights into population movement patterns at two geographical scales: county and state. The reliability of this dataset was confirmed through a high correlation with openly available data sources. Notably, it focused on the U.S. complements existing mobility datasets and caters specifically to the unique characteristics of mobility within the country.

## Mobility data of Mexico

The dataset involved daily movement of individuals within a country for various purposes, which created complex socio-economic interactions. Specifically, it presented a collection of human mobility networks that depict travel patterns between municipalities in Mexico during the period from January 1, 2020, to December 31, 2020 4. These networks were constructed based on geolocation data obtained from mobile devices, provided by Veraset, a company specializing in aggregated, anonymized mobile device location information. In the network representation, each municipality was represented as a node, and the weight of an edge (*i*, *j*) corresponded to the total number of observed trips from municipality *i* to municipality *j*, and was normalized by the varying number of mobile devices recorded on a given day. To account for the significantly higher volume of intracity mobility compared to travel between distinct locations, the municipalities forming metropolitan areas were consolidated into single nodes within the network.

1. Network feature extraction

## Unweighted node features

The most basic network features are In-Degree Centrality (IDC) and Out-Degree Centrality (ODC), which measure city’s local connectivity by counting the number of cities directly connected to and from the target city. Further, inward and outward closeness centrality (ICC and OCC) and betweenness centrality (BC) evaluate global connectivity based on the shortest paths in the mobility network. ICC and OCC comprehensively consider the shortest distance from all reachable cities to the observed city, specifically, ICC focuses on the ability of a city to reach all other cities in the network, which OCC reflects the city’s ability to be a gateway or connector to other destinations. A city with a high ICC or OCC is well-connected and can easily reach most other cities with shorter travel distances or fewer intermediate connections. BC measures its role as a hub city across the mobility network, in other words, it indicates the extent to which a city serves as a bridge or intermediary in facilitating the flow of population between other cities. Moreover, Eigenvector Centrality (EC) and PageRank (PR) quantify the connectivity of a city while taking into account the connectivity of other cities connected to it. Cities with high EC are not only popular destinations for travelers but are also connected to other popular cities. Clustering coefficient (C) valuates the degree of clustering among local cities. High clustering coefficients indicate that the neighbor cities of a given city are more likely to be connected to each other.

## Weighted node features

In Strength (IS) and Out Strength (OS) emphasize the strength of the local connectivity. Cities with high IS might be major hubs or attractive destinations, while cities with high OS might serve as significant starting points for travelers. Attraction Rate (AT) and Transfer Rate (TR) evaluate connectivity from the perspective of human transmission. The calculation of other weighted node features is similar to that of unweighted node features. It should be noted that a larger population flow between two cities indicates a closer relationship between the departure city and the destination city. When calculating the shortest path in Weighted Inward Closeness Centrality (WICC), Weighted Outward Closeness Centrality (WOCC), and Weighted Betweenness Centrality (WBC), the reciprocal of population flow between two cities is regarded as their distance.

## Unweighted global features

The global network features consider all nodes in each snapshot, therefore, nodes in the same snapshot share the same global network feature. Number of Edges (NE) indicates the number of migration events or connections between cities. Density (D) refers to a measure of how interconnected or crowded the network is in relation to all possible connections that could exist. Average Clustering coefficient (AC) provides information about the overall structure of the mobility network, networks with a high AC tend to have a more clustered or modular structure, where cities are organized into tightly interconnected groups. Transitivity (T) indicates the degree to which the network exhibits the property of transitivity or transitive relationships among cities, a high transitivity suggests that cities tend to be part of larger regional or corridor patterns where population movement between cities is interconnected and not just limited to direct pairwise connections. Degree Assortativity coefficient (DA) assesses whether cities tend to be connected to other cities with similar volume of population movement, it helps reveal patterns of city’s connectivity within the mobility network.

## Weighted global features

Total Weight (TW) indicates the volume of population movement between cities in the entire mobility network. Weighted Average Clustering coefficient (WAC) and Strength Assortativity coefficient (SA) are similar to AC and DA however, they further consider the strength of connections.

**Supplementary Table 1 | Considered node features.**

| Features | Definition | Description |
| --- | --- | --- |
| ***Unweighted node features*** | | |
| In-degree Centrality  (IDC) |  | IDC is the fraction of the number of incoming edges of node *i* and the total number of nodes of the network. *N* is the set of all nodes in the network, *n* is the number of nodes, and is the in-degree of the node *i*. |
| Out-degree Centrality  (ODC) |  | ODC is the fraction of the number of outcoming edges of node *i* and the total number of nodes of the network. is the out-degree of the node *i*. |
| Inward Closeness  Centrality (ICC) 5 |  | ICC is the reciprocal of the average shortest inward path distance to node *i* over all *n*-1 reachable nodes. represents the shortest path length from node *j* to node *i*. |
| Outward Closeness  Centrality (OCC) 5 |  | OCC is the reciprocal of the average shortest outward path distance to node *i* over all *n*-1 reachable nodes. |
| Eigenvector Centrality  (EC) 6 |  | EC is the centrality for node *i* depends on the centrality of its neighbors. is the element of the adjacency matrix of the network, and should be less than the reciprocal of maximum eigenvalue of the adjacency matrix. |
| Betweenness Centrality  (BC) 7 |  | BC is the sum of the fraction of all-pairs shortest paths that pass through node *i*. denotes the total number of shortest paths from node *s* to node *t*, and represents the number of shortest paths from node *s* to node *t* that pass through node *i.* |
| PageRank (PR) 8 |  | PR is a rank of node *i* based on the structure of the incoming edges. It was originally designed as an algorithm to rank web pages. *c* is a free parameter between zero and one. In this study, we set *c*=0.85. |
| Clustering coefficient  (C) 9 |  | C is the fraction of all possible directed triangles through that node that exist. is the number of directed triangles through node *i*. |
| ***Weighed node features*** | | |
| In Strength (IS) |  | IS is the sum of the weights of incoming edges of node *i*. denotes the node set that link to node *i*, and represents the weight of the edge from node *j* to node *i*. |
| Out Strength (OS) |  | OS is the sum of the weights of outcoming edges of node *i*. is the node set that link from node *i*. |
| Weighted Inward  Closeness Centrality  (WICC) 5 |  | WICC is the reciprocal of the average shortest inward path distance to node *i* over all *n*-1 reachable nodes. represents the weighted shortest path length from node *j* to node *i*. |
| Weighted Outward Closeness Centrality (WOCC) 5 |  | WOCC is the reciprocal of the average weighted shortest outward path distance to node *i* over all *n*-1 reachable nodes. |
| Weighted Eigenvector Centrality (WEC) 6 |  | WEC is the centrality for node *i* depends on the centrality of its neighbors. is the element of the weighted adjacency matrix of the network. |
| Weighted Betweenness Centrality (WBC) 7 |  | WBC is the sum of the fraction of all-pairs weighted shortest paths that pass through node *i.* denotes the total number of weighted shortest paths from node *s* to node *t*, and represents the number of weighted shortest paths from node *s* to node *t* that pass through node *i.* |
| Weighted Clustering coefficient  (WC) 10 |  | WC is defined as the geometric average of the subgraph edge weights. The edge weights are normalized by the maximum weight in the network . |
| Attraction Rate (AR) 11 |  | AR is the sum of the weight of edge link to node *i* and out strength of the nodes that link to node *i*. |
| Transfer Rate (*TR*) 11 |  | TR is the sum of the weight of edge link from node *i* and in strength of the nodes that link from node *i*. |
| ***Unweighted global features*** | | |
| Number of Edges  (NE) |  | NE is the total number of edges in the network, *E* is the edges set. |
| Density (D) |  | Dis the fraction of edges in the network and the maximum possible edges in the network if the network is complete. |
| Average Clustering  coefficient (AC) 12 |  | AC is the average of clustering coefficient of all nodes. |
| Transitivity (T) 13 |  | T is the fraction of all possible triangles present in the network, and possible triangles are identified by the number of “triads” (two edges with a shared vertex). |
| Degree Assortativity  coefficient (DA) 14 |  | DA is the Pearson correlation coefficient of degree between pairs of linked nodes. |
| ***Weighted global features*** | | |
| Total Weights  (TW) |  | TW is sum of the weights of all the edges in the network. *w*(*e*) is the weight of edge *e*, . |
| Average Weighted Clustering coefficient  (AWC) 10 |  | AWC is the average of weighted clustering coefficient of all nodes. |
| Strength Assortativity  coefficient (SA) 15 |  | SA is the Pearson correlation coefficient of weight between pairs of linked nodes. |

1. Additional results of correlation between CO2 emissions and human mobility


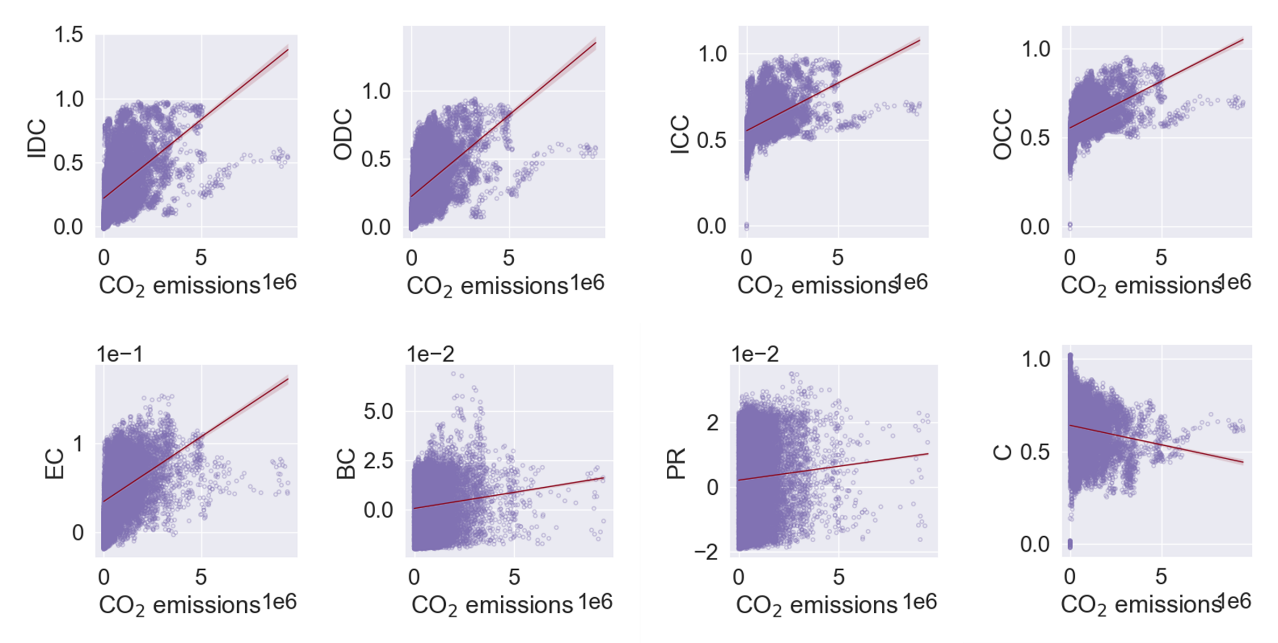


**Supplementary Fig. 1 | Correlation between the unweighted node features and multi-source CO2 emissions.**


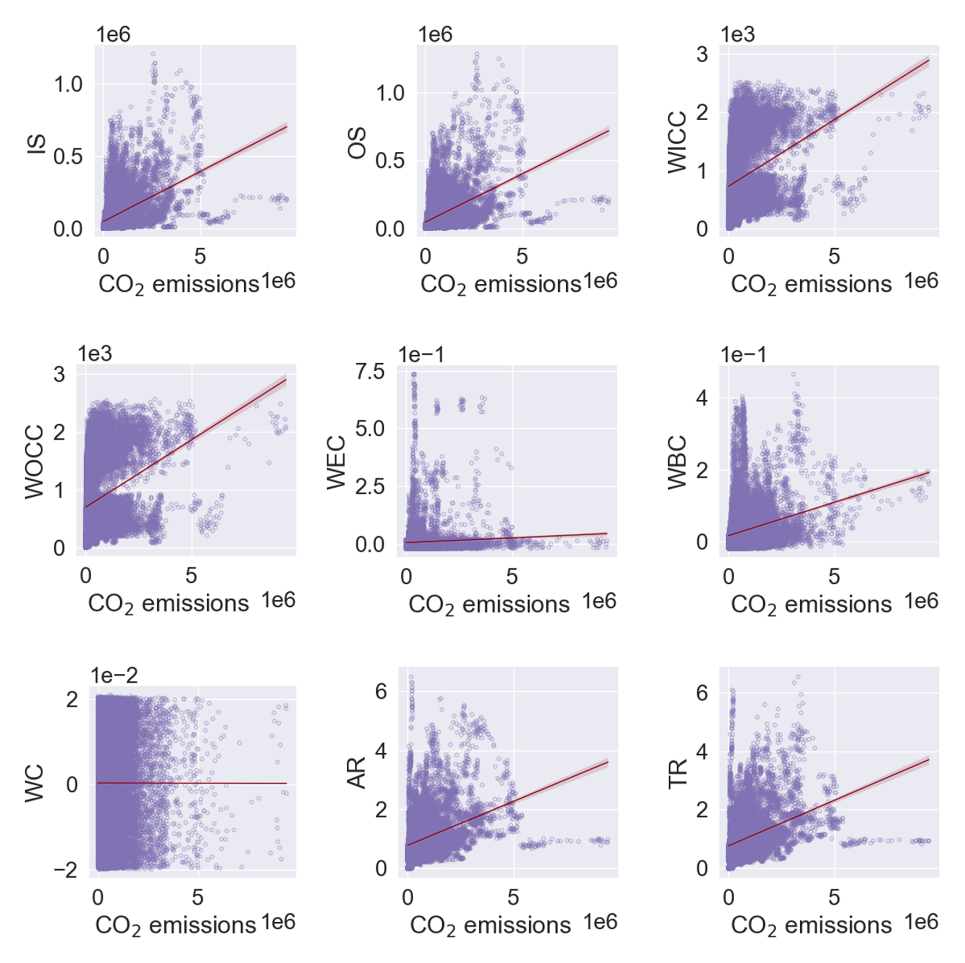


**Supplementary Fig. 2 | Correlation between the weighted node features and multi-source CO2 emissions.**

1. Additional results of model evaluation


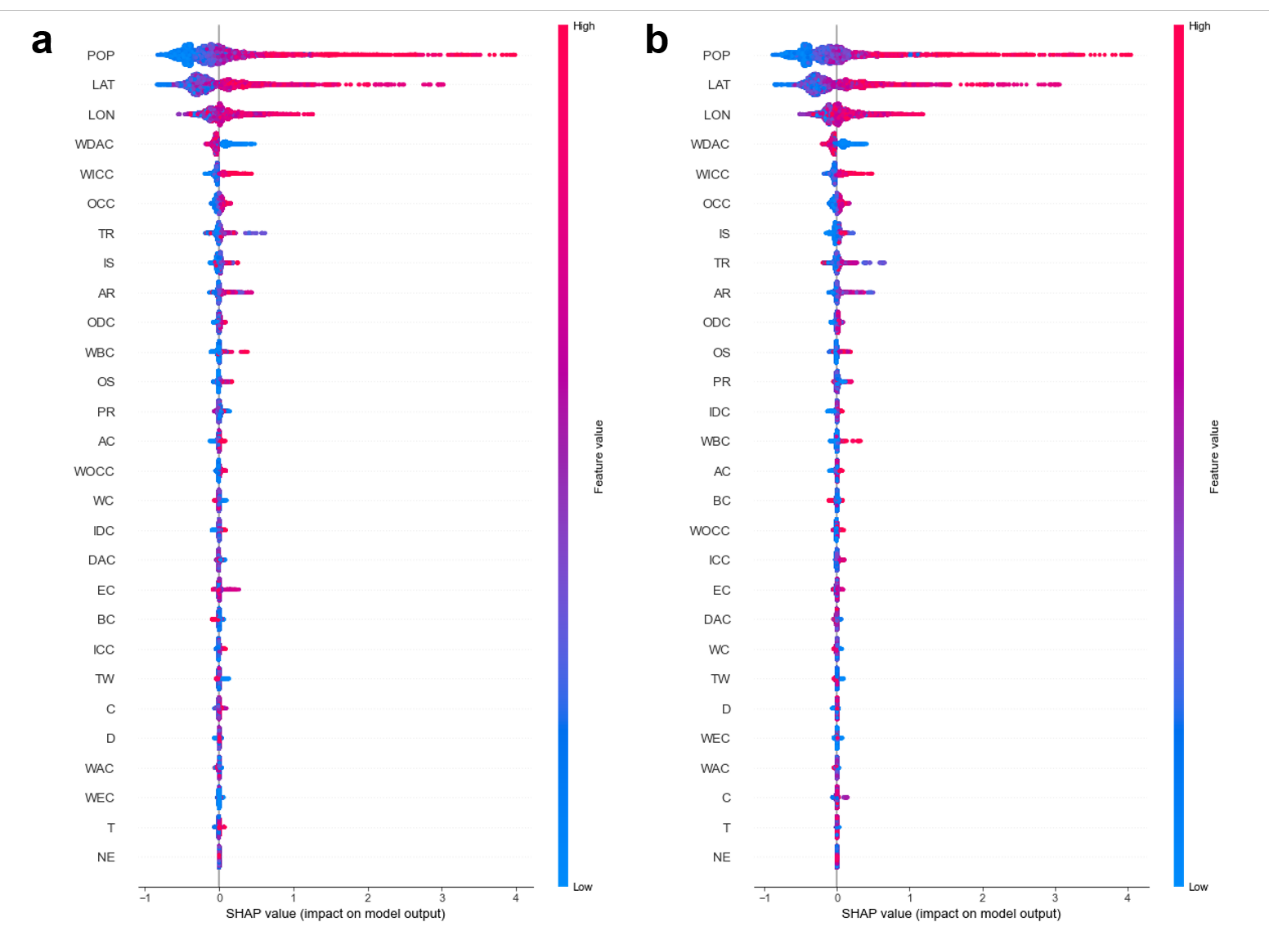


**Supplementary Fig. 3 | a, b. Summary of SHAP values for predicting multi-source CO2 emissions with split *Strategy* 1 and *Strategy* 2.**


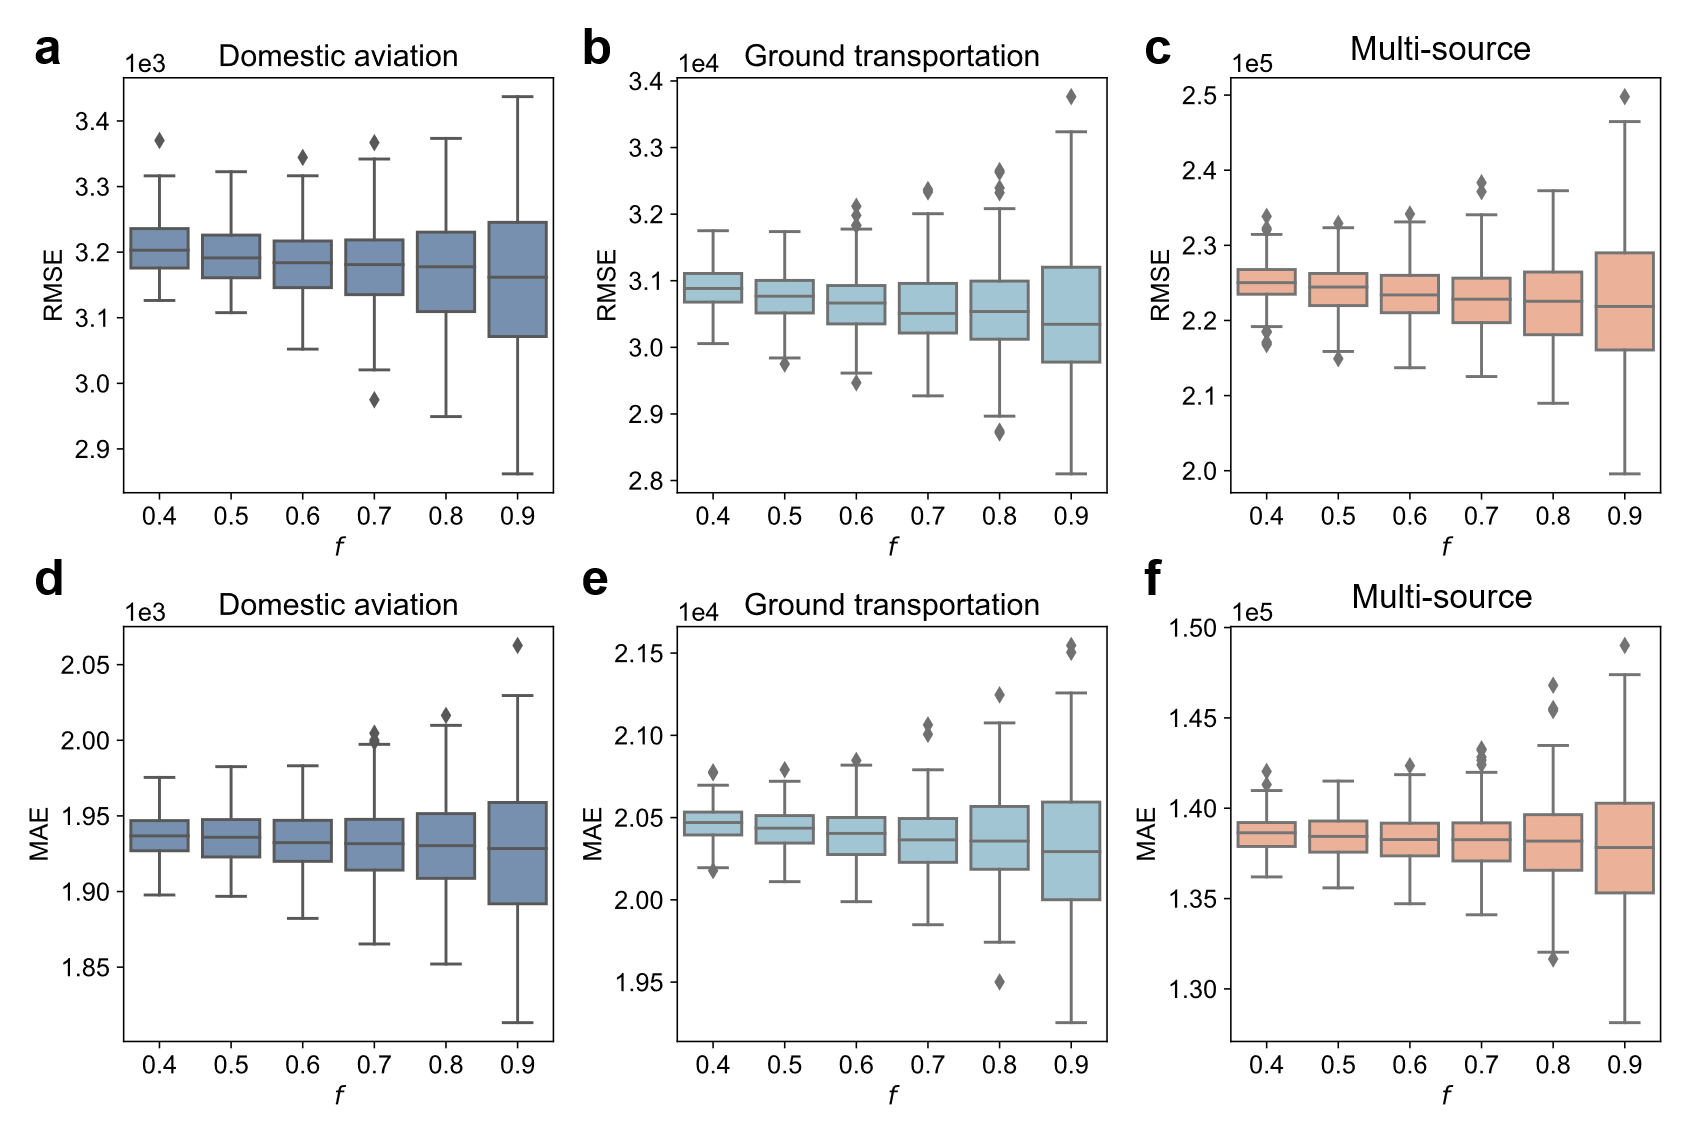


**Supplementary Fig. 4 | Cross-validation statistics based on *Strategy* 1 with 200 random splits of the null model. a-f,** The RMSE and MAE of LGBM use tenfold cross-validation to predict CO2 emissions of domestic aviation, ground transportation, and multi-source, respectively. Each box in the boxplot illustrates the predicting accuracy obtained by 200 implementations with the independent random split of training and testing sets on a certain proportion. Different boxes display the predicting accuracy based on different sizes of the training sets, ranging from 0.4 to 0.9, and *f* symbolizes the fraction of training set. The testing set is always the complementary part of the entire data set to the training set.


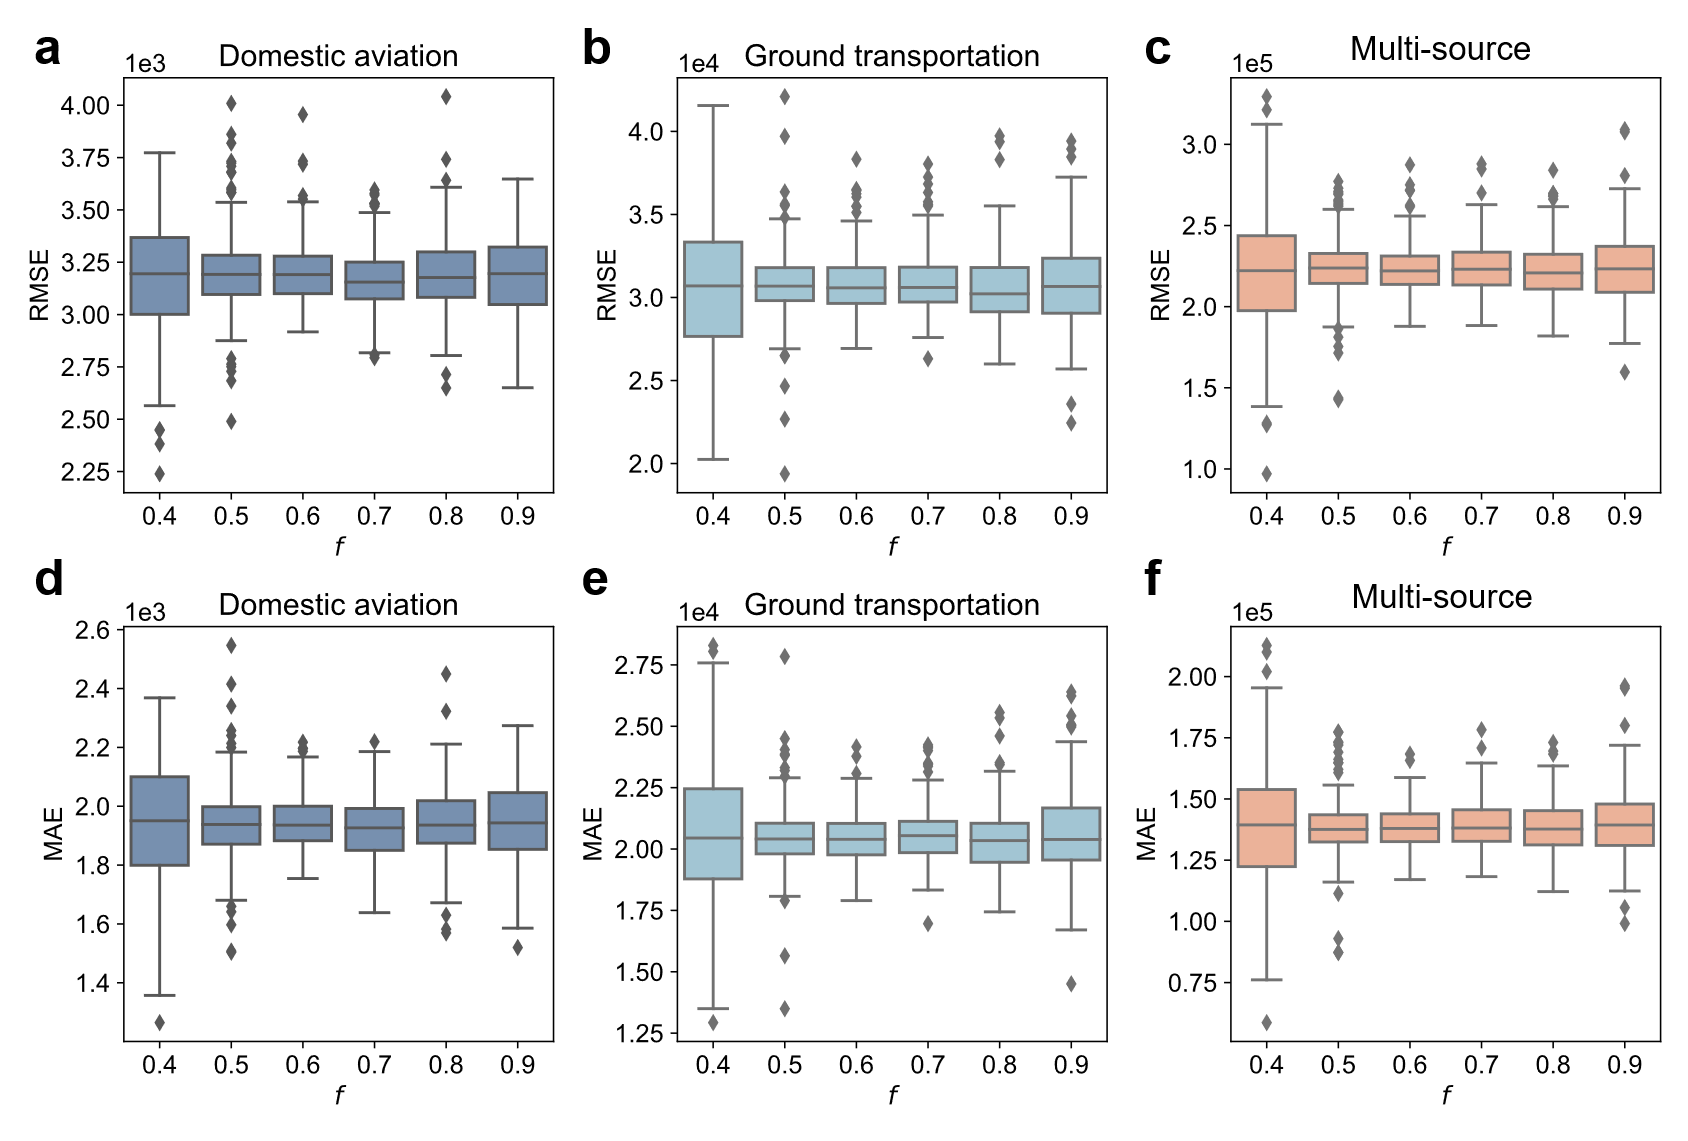


**Supplementary Fig. 5 | Cross-validation statistics based on *Strategy* 2 with 200 random splits of the null model. a-f,** The RMSE and MAE of LGBM use tenfold cross-validation to predict CO2 emissions of domestic aviation, ground transportation, and multi-source, respectively. Each box in the boxplot illustrates the predicting accuracy obtained by 200 implementations with the independent random split of training and testing sets on a certain proportion. Different boxes display the predicting accuracy based on different sizes of the training sets, ranging from 0.4 to 0.9, and *f* symbolizes the fraction of training set. The testing set is always the complementary part of the entire data set to the training set.

1. Additional results of model generalization and extrapolation


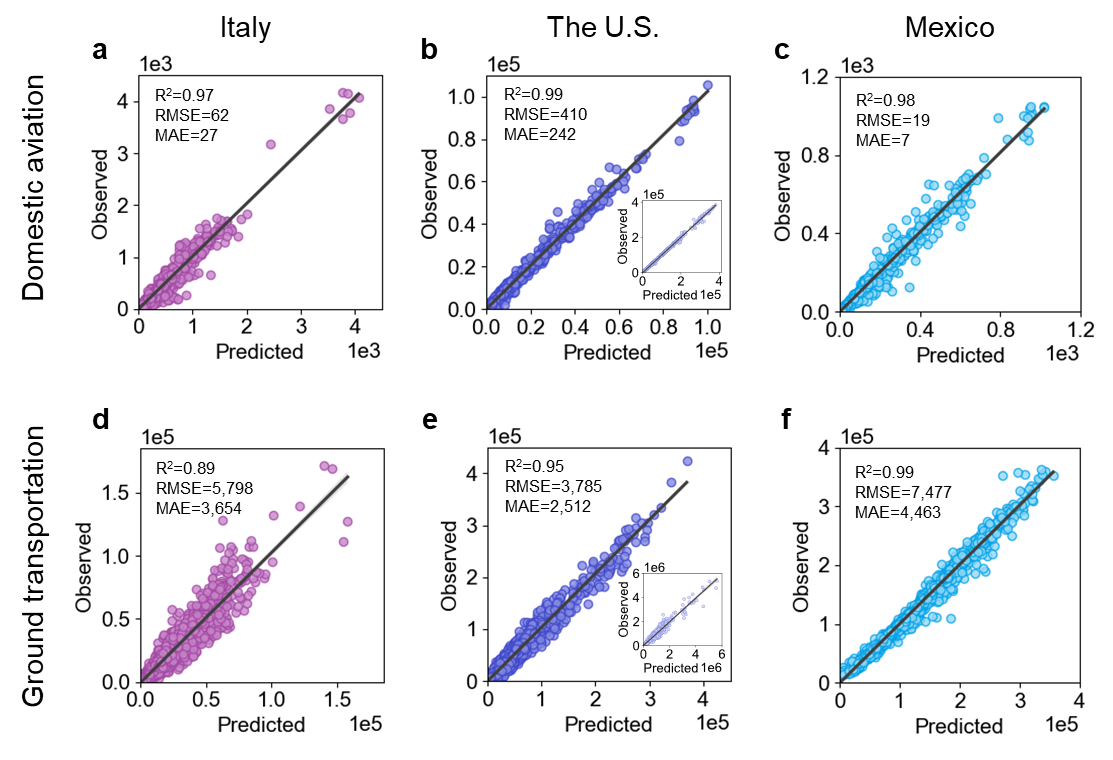


**Supplementary Fig. 6 | Compassions of the observed and predicted domestic aviation and ground transportation CO2 emissions of Italy, U.S., and Mexico.**

1. Division of city cluster in normal times

**Supplementary Table 2 | Division of city cluster in normal times**

| Communities | Members |
| --- | --- |
| 1-Beijing-Tianjin-Hebei | Tangshan, Handan, Tianjin Municipality, Binzhou, Shijiazhuang, Beijing, Jinan, Liaocheng, Xilin Gol League, Zibo, Weifang, Anyang, Qinhuangdao, Baoding, Xingtai, Zhangjiakou, Chengde, Yantai, Dezhou, Cangzhou, Qingdao, Tai'an, Langfang, Dongying, Hengshui, Weihai, Hebi, Puyang. |
| 2-Northwest (Ordos) | Ordos, Yulin, Yinchuan, Baotou, Linfen, Hohhot, Datong, Weinan, Yuncheng, Luliang, Taiyuan, Wuhai, Changzhi, Jinzhong, Ulanqab, Shuozhou, Jincheng, Xianyang, Xinzhou, Wuzhong, Bayannur, Jiayuguan, Xi 'an, Lanzhou, Pingliang, Baoji, Baiyin, Shizuishan, Zhongwei, Yangquan, Alxa League, Sanmenxia, Tongchuan, Xining, Jiuquan, Haixi Mongolian and Tibetan Autonomous Prefecture, Tianshui, Dingxi, Longnan, Guyuan, Haidong, Yan 'an, Jinchang, Shangluo, Zhangye, The city of Shigatse, Linxia Hui Autonomous Prefecture, Ali region, Naqu region, Wuwei, Qingyang, Shannan, Tibetan Autonomous Prefecture of Yushu, Haibei Tibetan Autonomous Prefecture, Nyingchi, Lhasa, Gannan Tibetan Autonomous Prefecture, Hainan Tibetan Autonomous Prefecture, Guoluo Tibetan Autonomous Prefecture, Huangnan Tibetan Autonomous Prefecture. |
| 3-Yangtze River Delta | Suzhou, Shanghai, Ningbo, Nanjing, Zhenjiang, Wuxi, Nantong, Hangzhou, Changzhou, Yangzhou, Maanshan, Wuhu, Yancheng, Wenzhou, Jiaxing, Taizhou, Jinhua, Huzhou, Lianyungang, Huai'an, Quzhou, Taizhou, Shaoxing, Xuancheng, Chuzhou, Bengbu, Suqian, Lishui, Zhoushan, Huangshan. |
| 4-Central China | Xuzhou, Zhengzhou, Jining, Linyi, Huainan, Luoyang, Rizhao, Hefei, Xinxiang, Nanyang, Tongling, Jiaozuo, Anqing, Huaibei, Jiyuan, Zaozhuang, Heze, Shangqiu, Fuyang, Suzhou, Xinyang, Pingdingshan, Zhumadian, Xiangyang, Xuchang, Kaifeng, Chizhou, Zhoukou, Lu'an, Luohe, Shiyan, Bozhou, Ankang, Shennongjia Forestry District. |
| 5-Northeast | Tongliao, Hulunbuir, Anshan, Chifeng, Harbin, Changchun, Jilin, Shenyang, Dalian, Hinggan League, Tieling, Qiqihar, Daqing, Yingkou, Fushun, Chaoyang, Jiamusi, Benxi, Siping, Fuxin, Liaoyang, Tonghua, Dandong, Shuangyashan, Huludao, Liaoyuan, Suihua, Jinzhou, Baicheng, Yanbian Korean Autonomous Prefecture, Mudanjiang, Qitaihe, Songyuan, Jixi, Yichun, Heihe, Baishan, Hegang, Panjin, Daxing'anling Prefecture. |
| 6-South Central (Wuhan) | Wuhan, Fuzhou, Shaoyang, Quanzhou, Shangrao, Ganzhou, Yichun, Jiujiang, Ji'an, Sanming, Loudi, Hengyang, Nanchang, Huanggang, Changde, Changsha, Huangshi, Longyan, Yueyang, Zhuzhou, Pingxiang, Chenzhou, Yichang, Jingmen, Fuzhou, Yiyang, Jingzhou, Yongzhou, Zhangzhou, Ezhou, Putian, Xianning, Xiaogan, Ningde, Hezhou, Jingdezhen, Xiamen, Xiangtan, Nanping, Xinyu, Yingtan, Zhangjiajie, Suizhou, Tianmen, Xiantao, Qianjiang. |
| 7-Southwest (Chongqing) | Chongqing Municipality, Bijie, Liupanshui, Chengdu, Zunyi, Kunming, Qujing, Honghe Hani and Yi Autonomous Prefecture, Guiyang, Qiandinan Buyi and Miao Autonomous Prefecture, Leshan, Hanzhong, Dazhou, Yuxi, Liangshan Yi Autonomous Prefecture, Mianyang, Qiannan Buyi and Miao Autonomous Prefecture, Zhaotong, Huaihua, Anshun, Qiandongnan Miao and Dong Autonomous Prefecture, Yibin, Guang'an, Luzhou, Tongren, Neijiang, Chuxiong Yi Autonomous Prefecture, Nanchong, Dali Bai Autonomous Prefecture, Panzhihua, Meishan, Wenshan Zhuang and Miao Autonomous Prefecture, Baoshan, Deyang, Pu'er, Guangyuan, Enshi Tujia and Miao Autonomous Prefecture, Bazhong, Lijiang, Xiangxi Tujia and Miao Autonomous Prefecture, Lincang, Ganzi Tibetan Autonomous Prefecture, Zigong, Suining, Ya'an, Qamdo, Dehong Dai and Jingpo Autonomous Prefecture, Ziyang, Aba Tibetan and Qiang Autonomous Prefecture, Xishuangbanna Dai Autonomous Prefecture, Diqing Tibetan Autonomous Prefecture, Nujiang Lisu Autonomous Prefecture. |
| 8-Pearl River Delta | Guangzhou, Dongguan, Huizhou, Foshan, Jieyang, Qingyuan, Shenzhen, Shantou, Shaoguan, Meizhou, Jiangmen, Yunfu, Yangjiang, Zhaoqing, Heyuan, Zhongshan, Shanwei, Chaozhou, Zhuhai. |
| 9-Northwest (Changji) | Changji Hui Autonomous Prefecture, Urumqi, Hami, Shihezi, Ili Kazak Autonomous Prefecture, Kashgar Prefecture, Tacheng Prefecture, Aksu Prefecture, Turpan, Bayingolin Mongolian Autonomous Prefecture, Wujiaqu, Hotan Prefecture, Altay Prefecture, Karamay, Bortala Mongolian Autonomous Prefecture, Kizilsu Kirgiz Autonomous Prefecture, Arar, Beitun, Shuanghe, Kokdala, Tiemenguan, Kunyu, Tumushuk. |
| 10-South (Zhanjiang) | Zhanjiang, Liuzhou, Baise, Guigang, Nanning, Maoming, Yulin, Guilin, Qinzhou, Laibin, Chongzuo, Hechi, Beihai, Wuzhou, Fangchenggang. |
| 11-South (Chengmai) | Chengmai County, Dongfang, Haikou, Changjiang Li Autonomous County, Ledong Li Autonomous County, Danzhou, Sanya, Wanning, Wenchang, Qionghai, Lingshui Li Autonomous County, Ding'an County, Lingao County, Tunchang county, Qiongzhong Li and Miao Autonomous County, Baisha Li Autonomous County, Baoting Li and Miao Autonomous County, Wuzhishan, Sansha. |

1. Data extrapolation and validation

The mobile phone data used for this study was aggregated from cellular signaling data (CSD), which are collected by China Unicom with rich spatio-temporal information. To improve the extrapolation and representation of the population, user coverage, ratio of calls with other operators, as well as a variety of parameters extracted from the structure of users’ age, gender, etc., were combined and modelled using a machine learning approach by the operator, generating estimates on the number of migrating users from the whole network.

The process of extrapolation is shown in the flowchart (Supplementary Fig. 7). Firstly, the locations of China Unicom users were extracted as a baseline for spatial aggregation. Secondly, phone calls, messaging, and other types of communications between China Unicom and other operators' users were weighted to estimate the number of users in the same district. Thirdly, district level user coverage ratios were summarized for each province; finally, the real user coverage ratios (market share), which are available at the provincial level, were then used to train and obtain the optimized weighting at different districts in step two. We used the F-test to confirm that this method fit real coverage ratios in four cities and all provinces in China. The F-test has a *P*-value of 0.999 and 0.584, respectively. Results indicate that, at a confidence level of 0.05, there is no discernible difference. Therefore, the coverage ratios are significantly correlated between the real and estimated values (Supplementary Fig. 8).

In addition, our analysis indicates that there is a high agreement on the two numbers (i.e., number of users from the whole network and from the operator). And the ratio from the operator’s own sum (*m*) to the network estimates (*m**), , varies from county to county. The correlation coefficients of *m* and *m** are all close to one at three admin levels: *r*=0.9999 for county level, and *r*=1.0 for both district and provincial level (Supplementary Fig. 9).


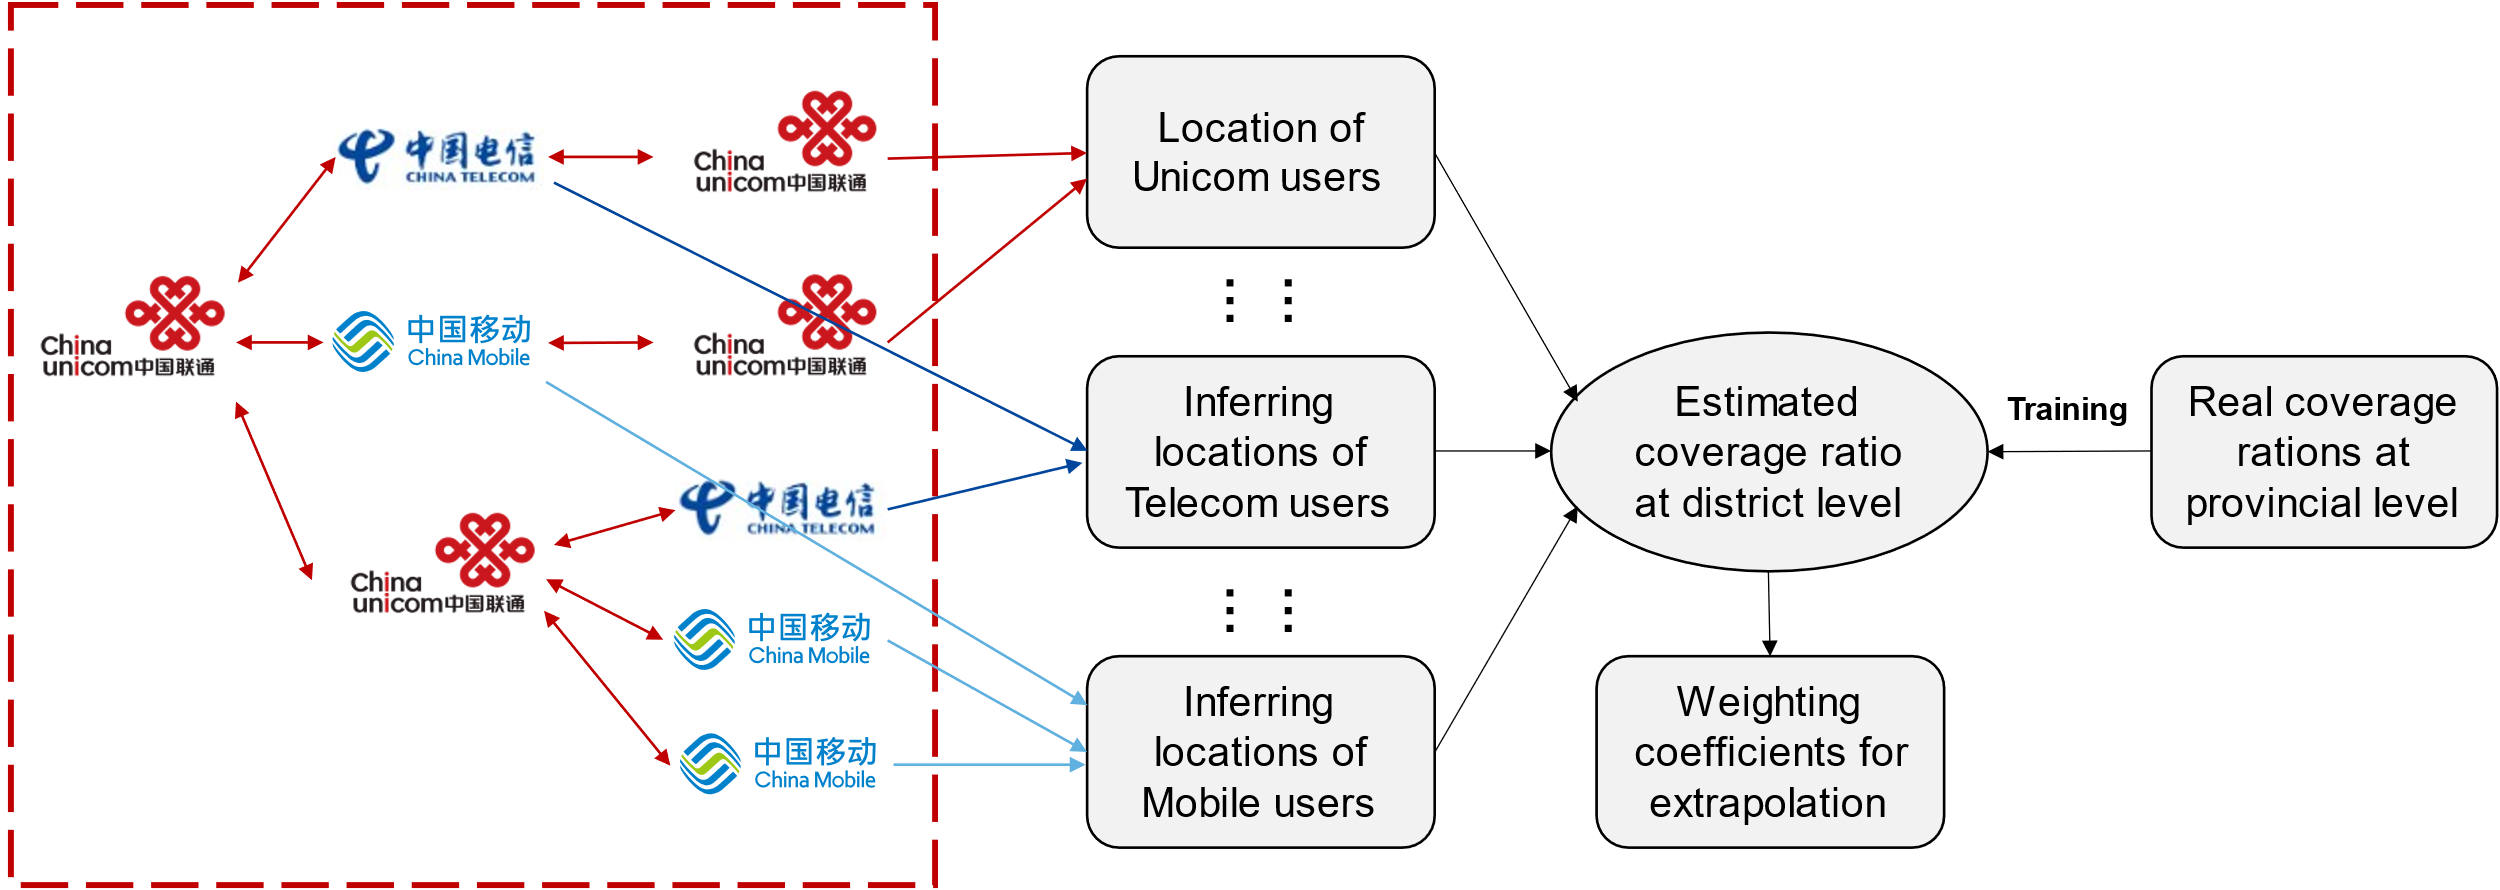


**Supplementary Fig. 7 |** Schematic chart for the workflow in data extrapolation.


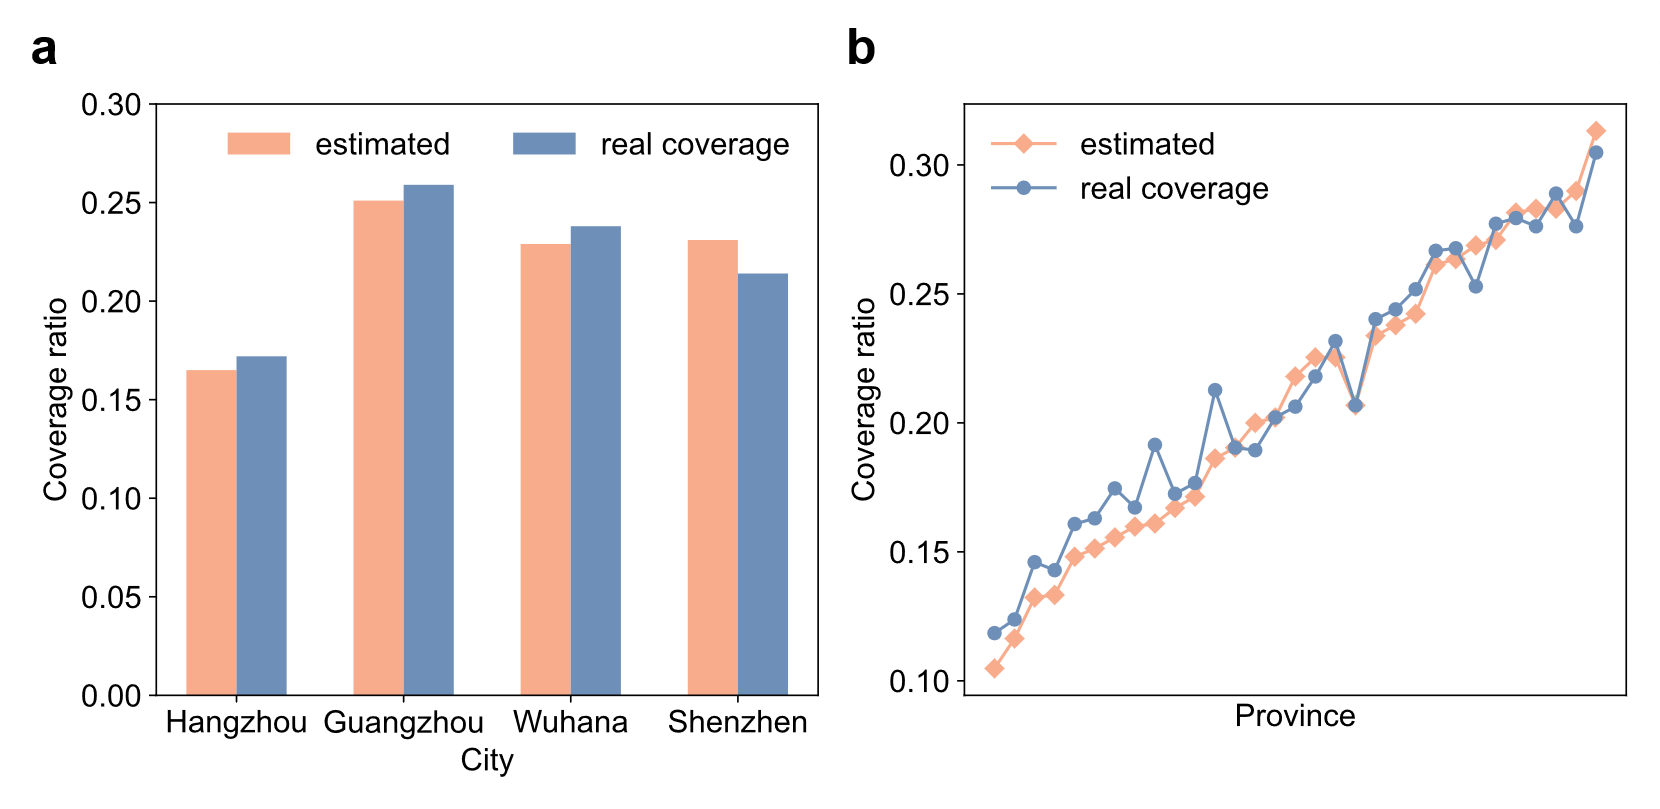


**Supplementary Fig. 8 | Validation of data extrapolation. a.** Comparison of real and estimated user coverage ratios in four selected cities: Hangzhou, Wuhan, Guangzhou and Shenzhen. **b.** Comparison of real and estimated user coverage ratios in all provinces (data provided by China Unicom).


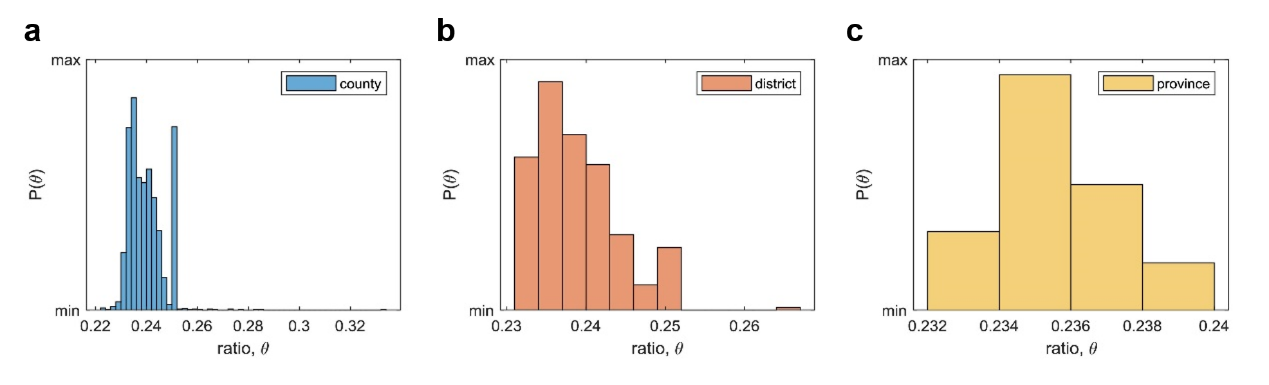


**Supplementary Fig. 9 | Ratio of estimated number of users from the whole network, to the number of users from the operator. a.** county level. **b.** district level. **c.** provincial level.

1. Data representativeness

We have implemented a comprehensive analysis on both user coverage and data representativeness, including compare the mobile phone estimates with population statics and GPS-based LBS (location-based services) during the study period.

## Comparison of mobile phone estimates with population statistics

The advantages of mobile phone data include extensive coverage and high representativeness. By November 2019, there were 1.6 billion mobile phone subscribers in China, with individuals owning more than one mobile phone number on average[[1]](#footnote-1). A total of 847 million Chinese people used mobile phones to surf the internet, accounting for 99.1% of the total netizens.

The use of mobile phones is almost 100% among those between the ages of 15 and 65. The general population can then be estimated by extrapolating from the number of users in the whole network against the dependency ratio, which is the proportion of people aged 0 to 14 and 65+ to those in the labor force (ages 15-64). In accordance with the National Bureau of Statistics[[2]](#footnote-2), China has a youth dependency ratio of 23.7% and an old-age dependency ratio of 16.8%.

We assessed the consistency between the population estimated from mobile phone data with the above adjustments, and the official statistics on the residential population for central prefectures at the district level using data provided by China Unicom (Fig. S10). The estimated number of residents and the official statistics are in good agreement (R2=0.98).

## Comparison of mobile phone estimates with Baidu LBS data

To investigate the difference between mobile phone data estimates and the flow generated by one of the most widely used open source, Baidu LBS (location-based services)[[3]](#footnote-3), we compared the top 10% of destination cities of a selected city (Wuhan) from both datasets, as shown in Fig. S11. In general, the cities estimated with heavy amount of flows from Wuhan by Baidu LBS, were also top destination cities estimated by the mobile phone data. For the first 20 to 30 cities outside of Wuhan, there is a great degree of consistency The first 20 to 30 cities outside of Wuhan exhibit great consistency, and the overall Pearson correlation is *r*=0.96 (*p*<0.001).

Data processing and aggregation adhered to the laws of “Provisions on Protecting the Personal Information of Telecommunications and Internet Users (Mainland China)”[[4]](#footnote-4), as well as the GSMA (Global System for Mobile Communications Association) guidelines on the protection of privacy in the use of mobile phone data for responding to the Ebola outbreak[[5]](#footnote-5). Only data that has been exported and aggregated at the city level was available to the authors. All mobility data were provided by the operator were anonymized and aggregated. No personally identifying information was processed in the analysis of this study.


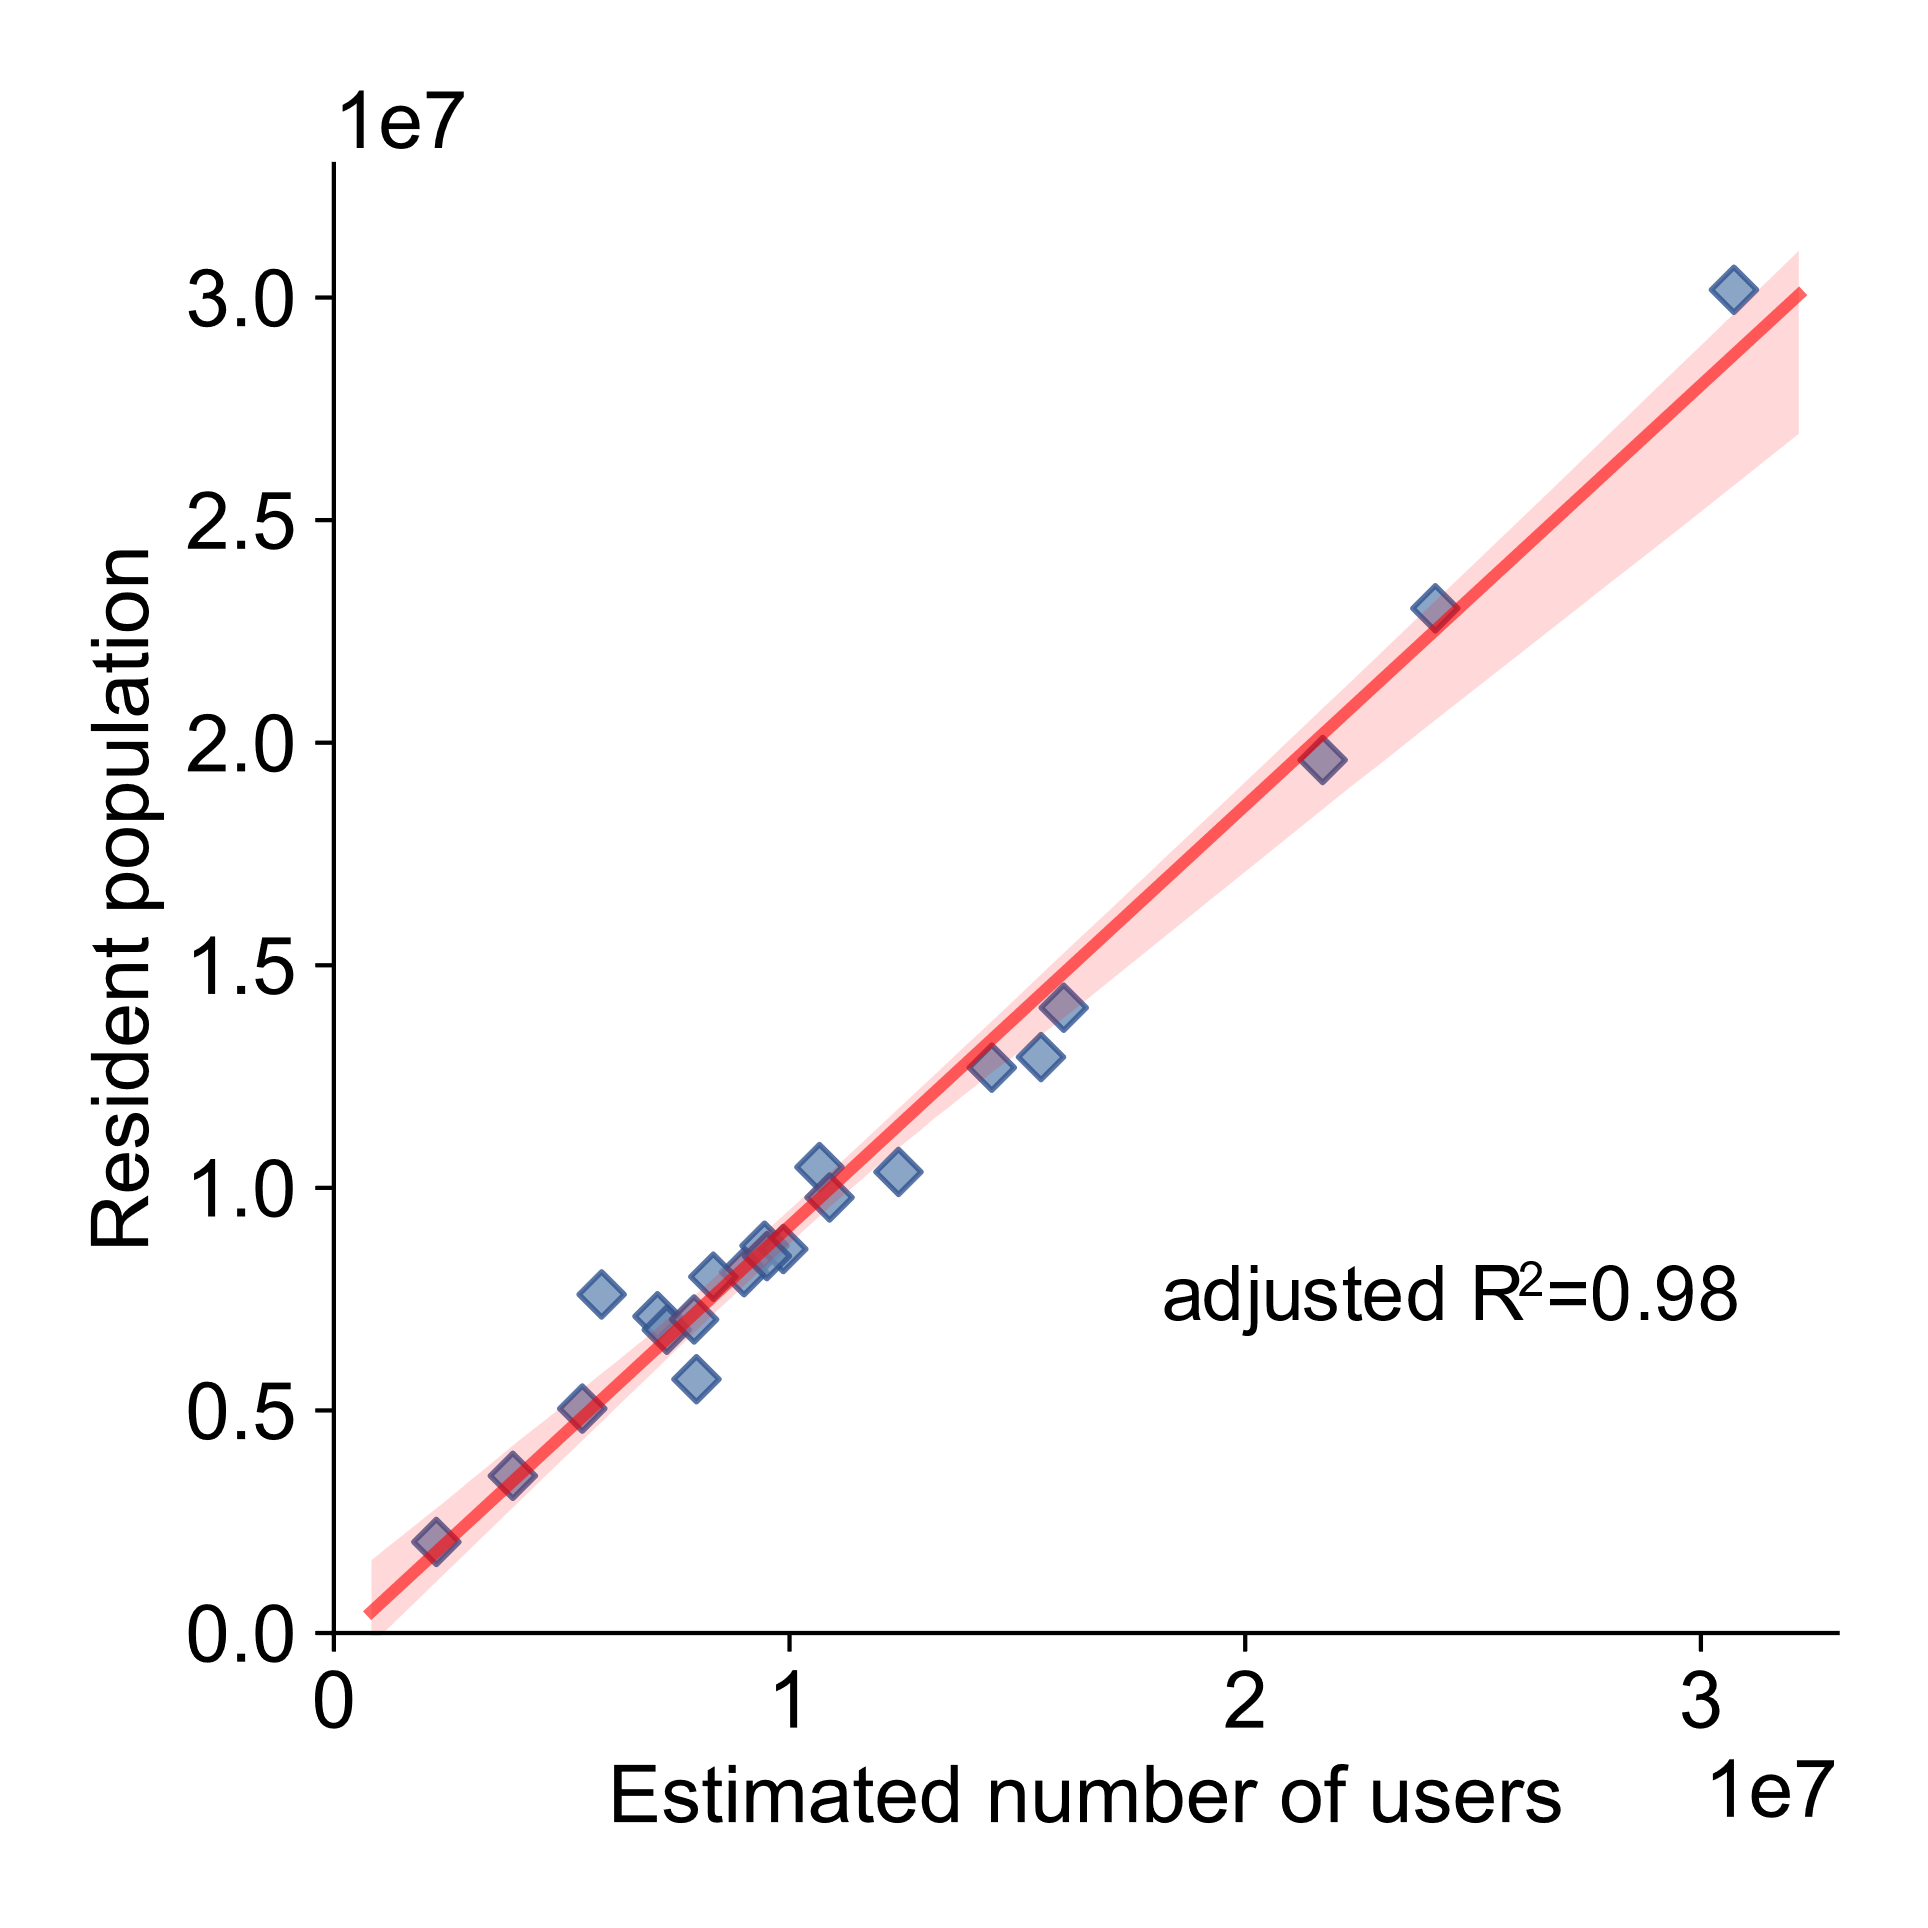


**Supplementary Fig. 10 | Consistency of mobile phone users’ estimates with the population data for central cities.** Data provided by China Unicom.


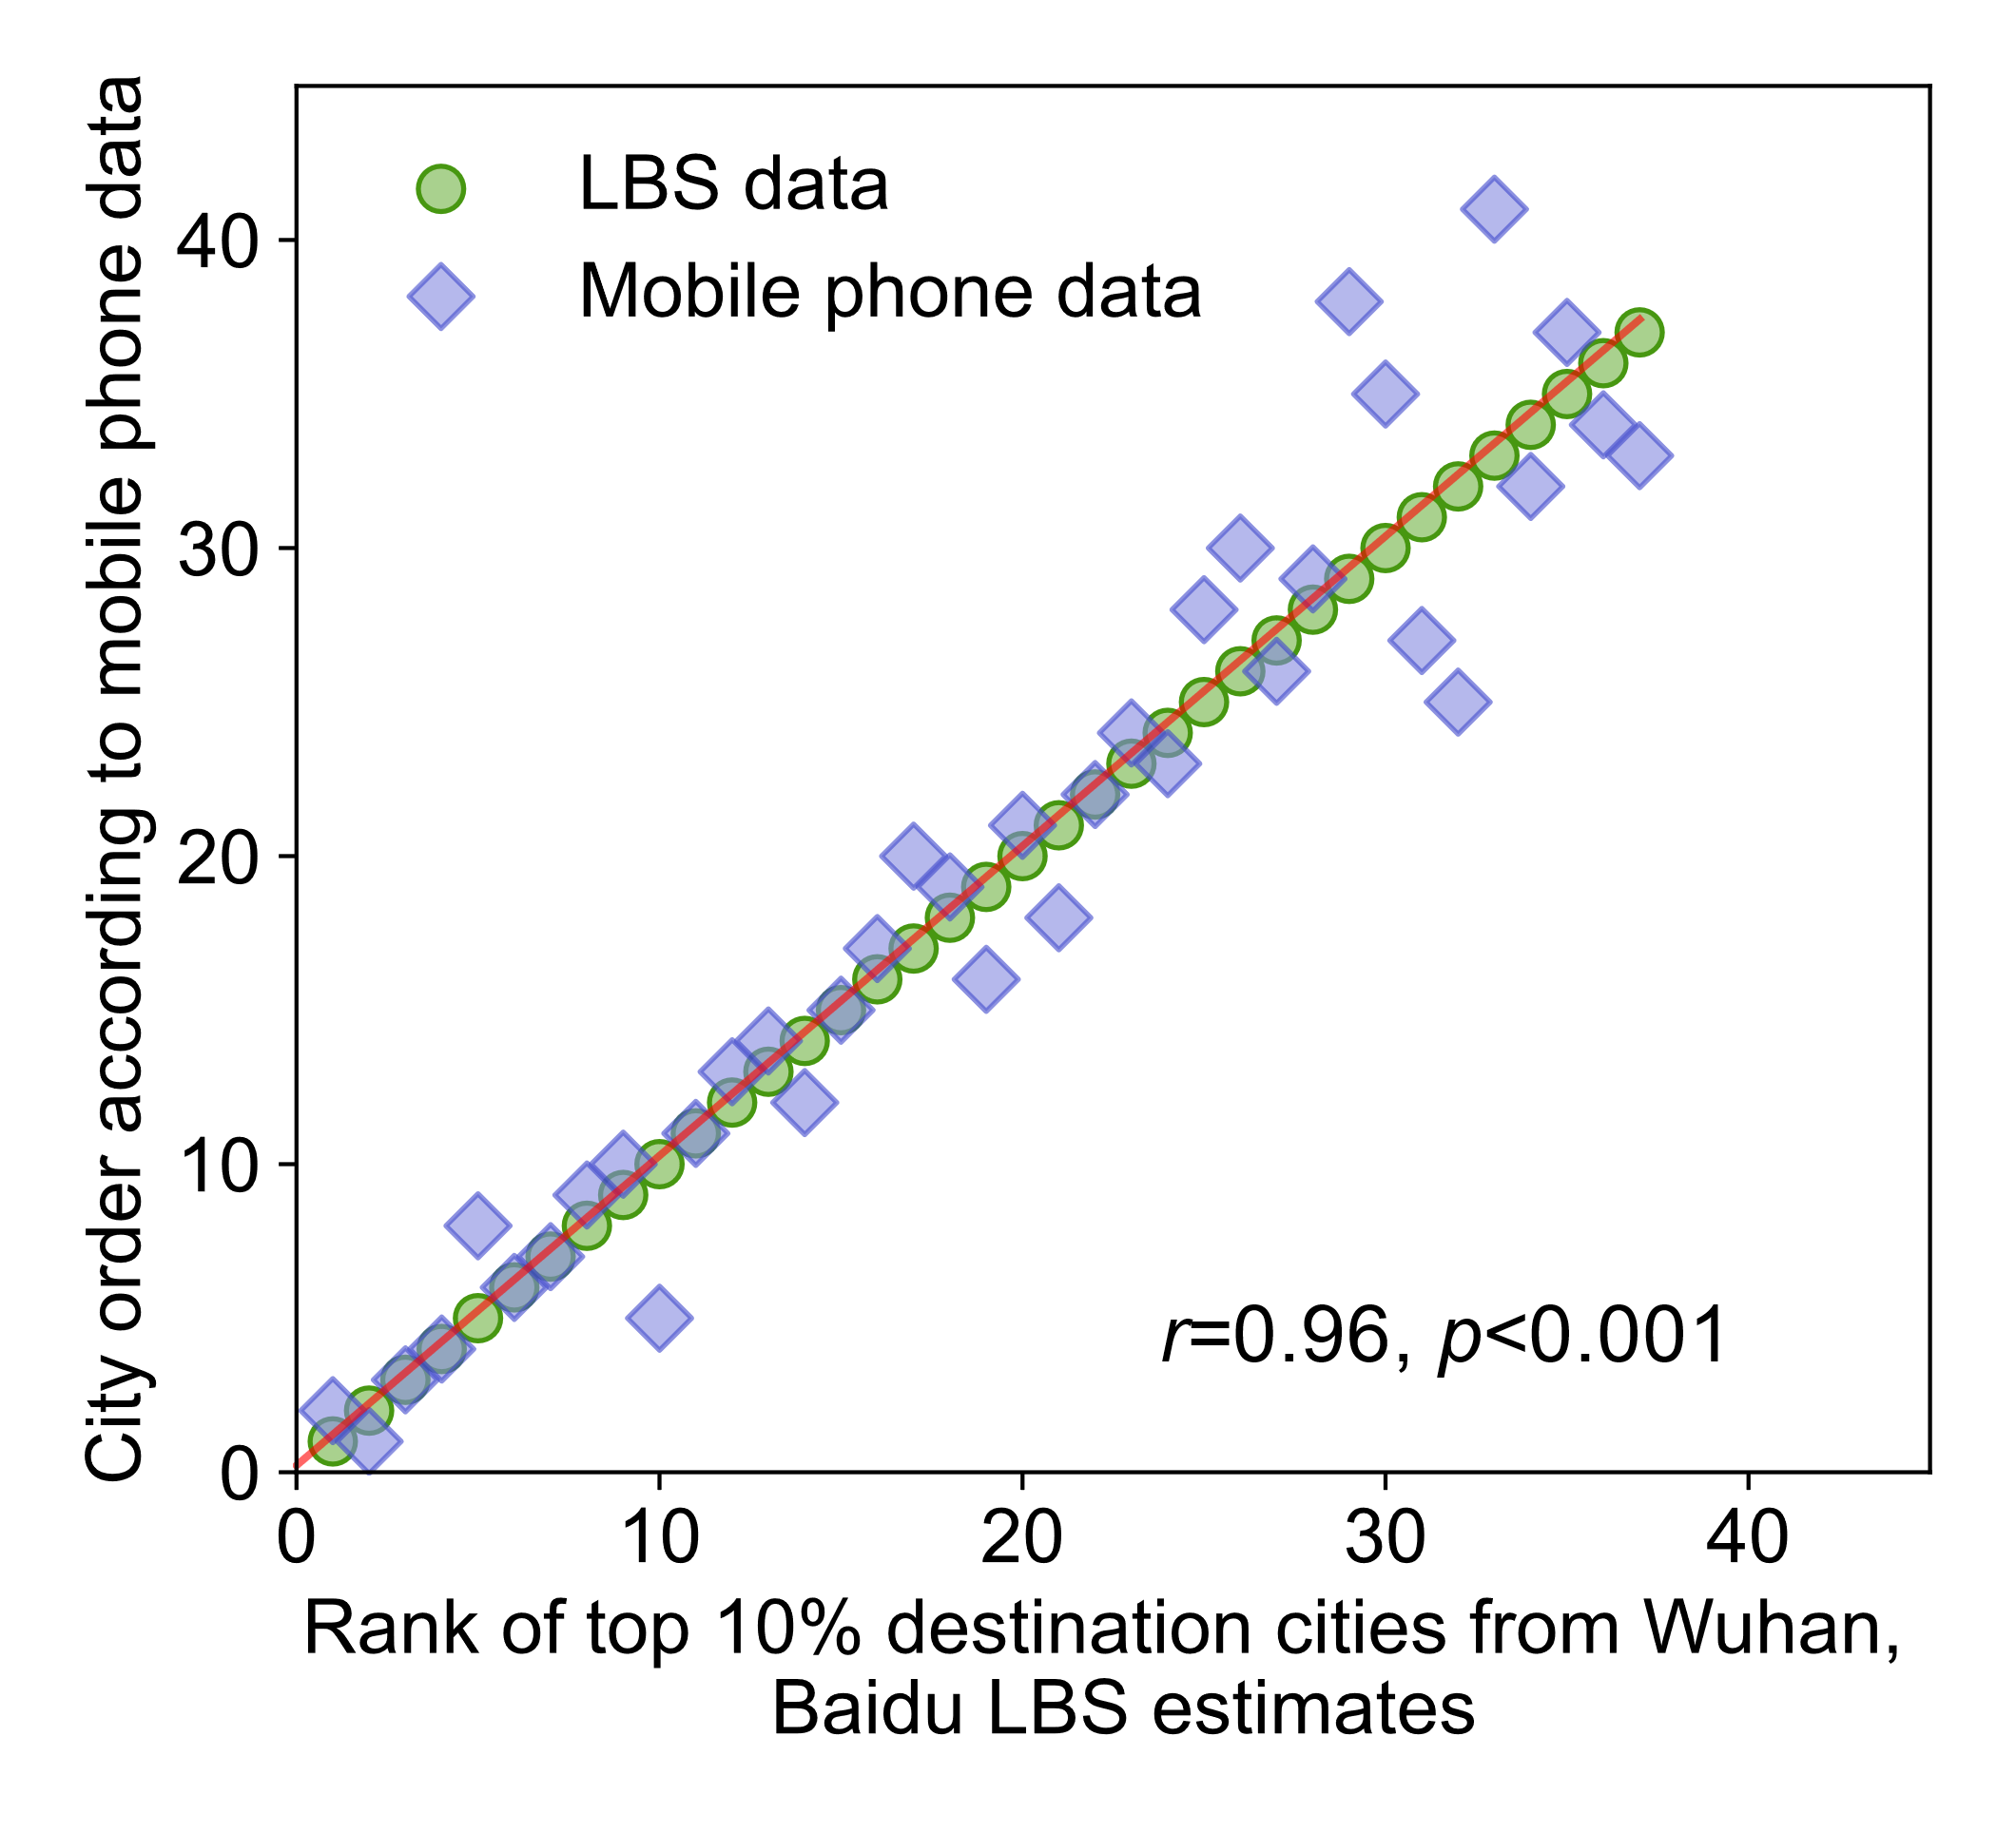


**Supplementary Fig. 11 | Comparison of the order of the top 10% destination cities from Wuhan on January 22, 2020, based on population flows estimated from China Unicom and Baidu data.**

References

1 China Unicom. Number of China Unicom mobile subscriptions from 2012 to 2022 (in millions). Statista https://www.statista.com/statistics/233968/number-of-china-unicom-mobile-subscriptions/ (2023)

2 Pepe, E. *et al.* COVID-19 outbreak response, a dataset to assess mobility changes in Italy following national lockdown. *Sci Data* **7**, 230 (2020).

3 Kang, Y. *et al.* Multiscale dynamic human mobility flow dataset in the U.S. during the COVID-19 epidemic. *Sci Data* **7**, 390 (2020).

4 Fontanelli, O. *et al.* Intermunicipal travel networks of Mexico during the COVID-19 pandemic. *Sci Rep* **13**, 8566 (2023).

5 Freeman, L. C. Centrality in social networks conceptual clarification. *Social Networks* **1**, 215-239 (1978).

6 Bonacich, P. Power and Centrality: A Family of Measures. *American Journal of Sociology* **92**, 1170-1182 (1987).

7 Freeman, L. C. A Set of Measures of Centrality Based on Betweenness. *Sociometry* **40**, 35-41 (1977).

8 Page, L., Brin, S., Motwani, R. & Winograd, T. The PageRank Citation Ranking : Bringing Order to the Web (Stanford InfoLab, 1999).

9 Fagiolo, G. Clustering in complex directed networks. *Phys. Rev. E* **76**, 026107 (2007).

10 Onnela, J.-P., Saramäki, J., Kertész, J. & Kaski, K. Intensity and coherence of motifs in weighted complex networks. *Physical Review E* **71**, 065103 (2005).

11 Liu, X., Bai, M. & Li, Y. *Identifying Important Nodes by Entropy Method*. In *2019 IEEE 7th International Conference on Computer Science and Network Technology (ICCSNT)* 170-173 (IEEE, 2019).

12 Watts, D. J. & Strogatz, S. H. Collective dynamics of ‘small-world’ networks. *Nature* **393**, 440-442 (1998).

13 Newman, M. E. J. The Structure and Function of Complex Networks. *SIAM Rev.* **45**, 167-256 (2003).

14 Newman, M. E. J. Assortative Mixing in Networks. *Phys. Rev. Lett.* **89**, 208701 (2002).

15 Leung, C. C. & Chau, H. F. Weighted assortative and disassortative networks model. *Physica A: Statistical Mechanics and its Applications* **378**, 591-602 (2007).

1. Number of mobile cell phone subscriptions in China from September November 2019 to November. China: mobile phone subscriptions by month 2019-2020, 2021. https://www.statista.com/statistics/278204/china-mobile-users-by-month/ [↑](#footnote-ref-1)
2. National Bureau of Statistics of China. http://www.stats.gov.cn [↑](#footnote-ref-2)
3. https://qianxi.baidu.com/ [↑](#footnote-ref-3)
4. Ministry of Industry and Information Technology of the People's Republic of China. *Regulations on the Protecting the personal information of Telecommunications and Internet Users.* http://www.miit.gov.cn/n1146285/n1146352/n3054355/n3057724/n3057729/c4700145/content.html. [↑](#footnote-ref-4)
5. GSMA. *GSMA Guidelines on the Protection of Privacy in the Use of mobile phone data for Responding to the Ebola Outbreak.* https://www.gsma.com/mobilefordevelopment/resources/gsma-guidelines-on-theprotection-of-privacy-in-the-use-of-mobile-phone-data-for-responding-to-the-ebola outbreak. [↑](#footnote-ref-5)
